# Supplementary material for: Nonparametric Analysis of Thermal Proteome Profiles Reveals Novel Drug-binding Proteins
Source: PubMed Central journal article supplement (PMC6885700; doi:10.1074/mcp.tir119.001481), 2019-10-03

# Annotated by GO term 'protein kinase'

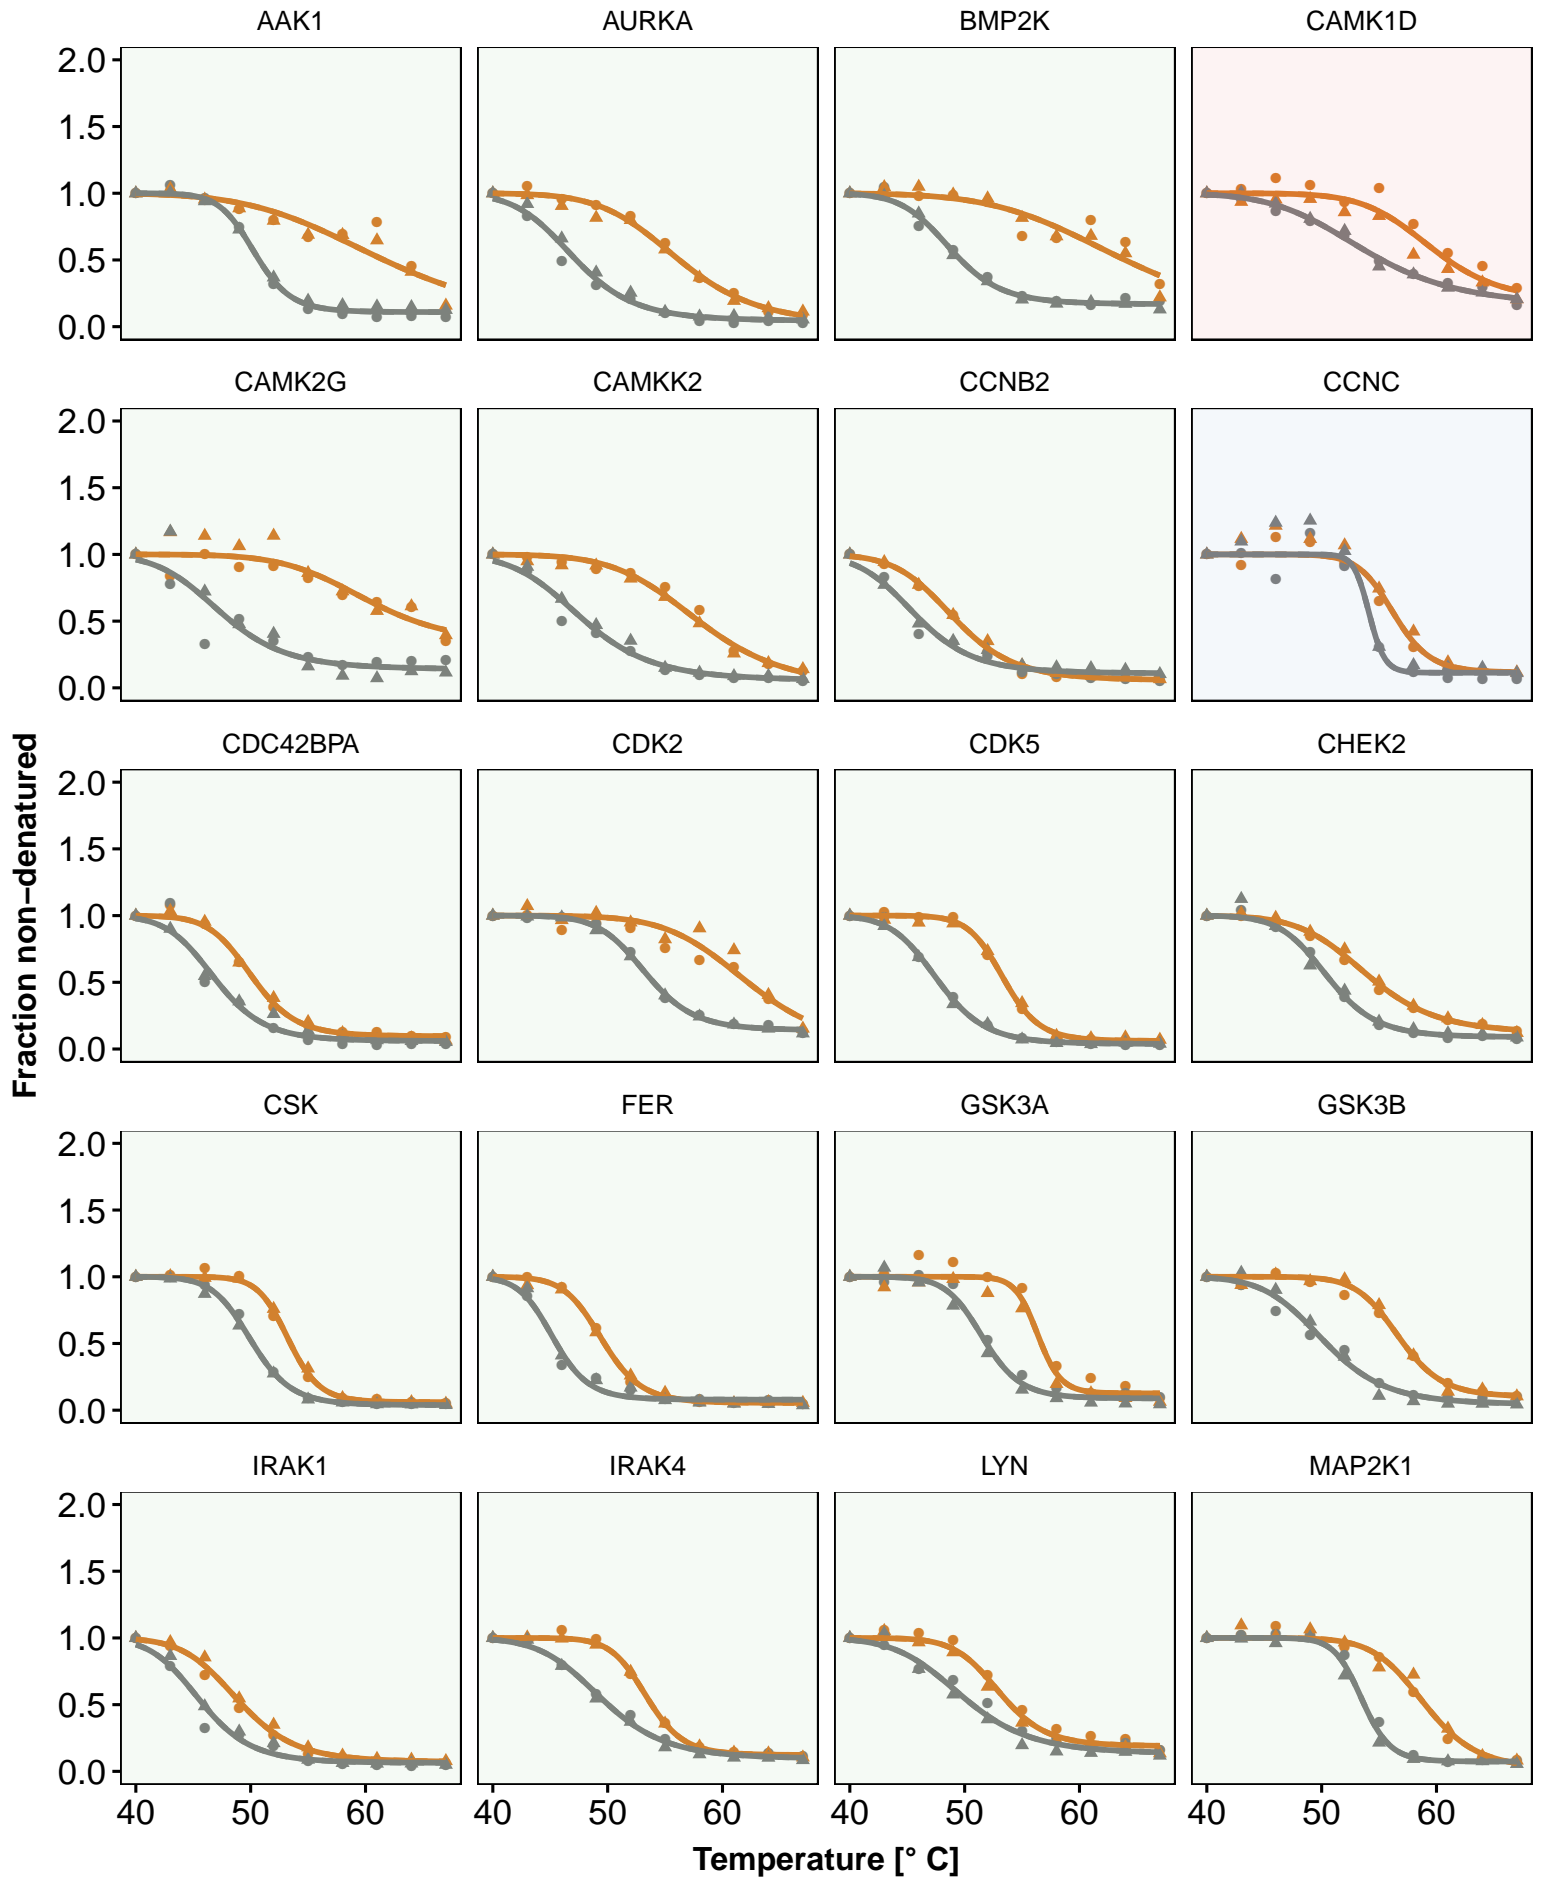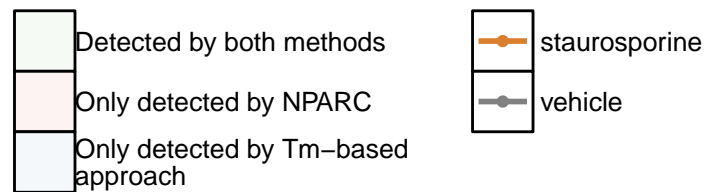

# Annotated by GO term 'protein kinase'

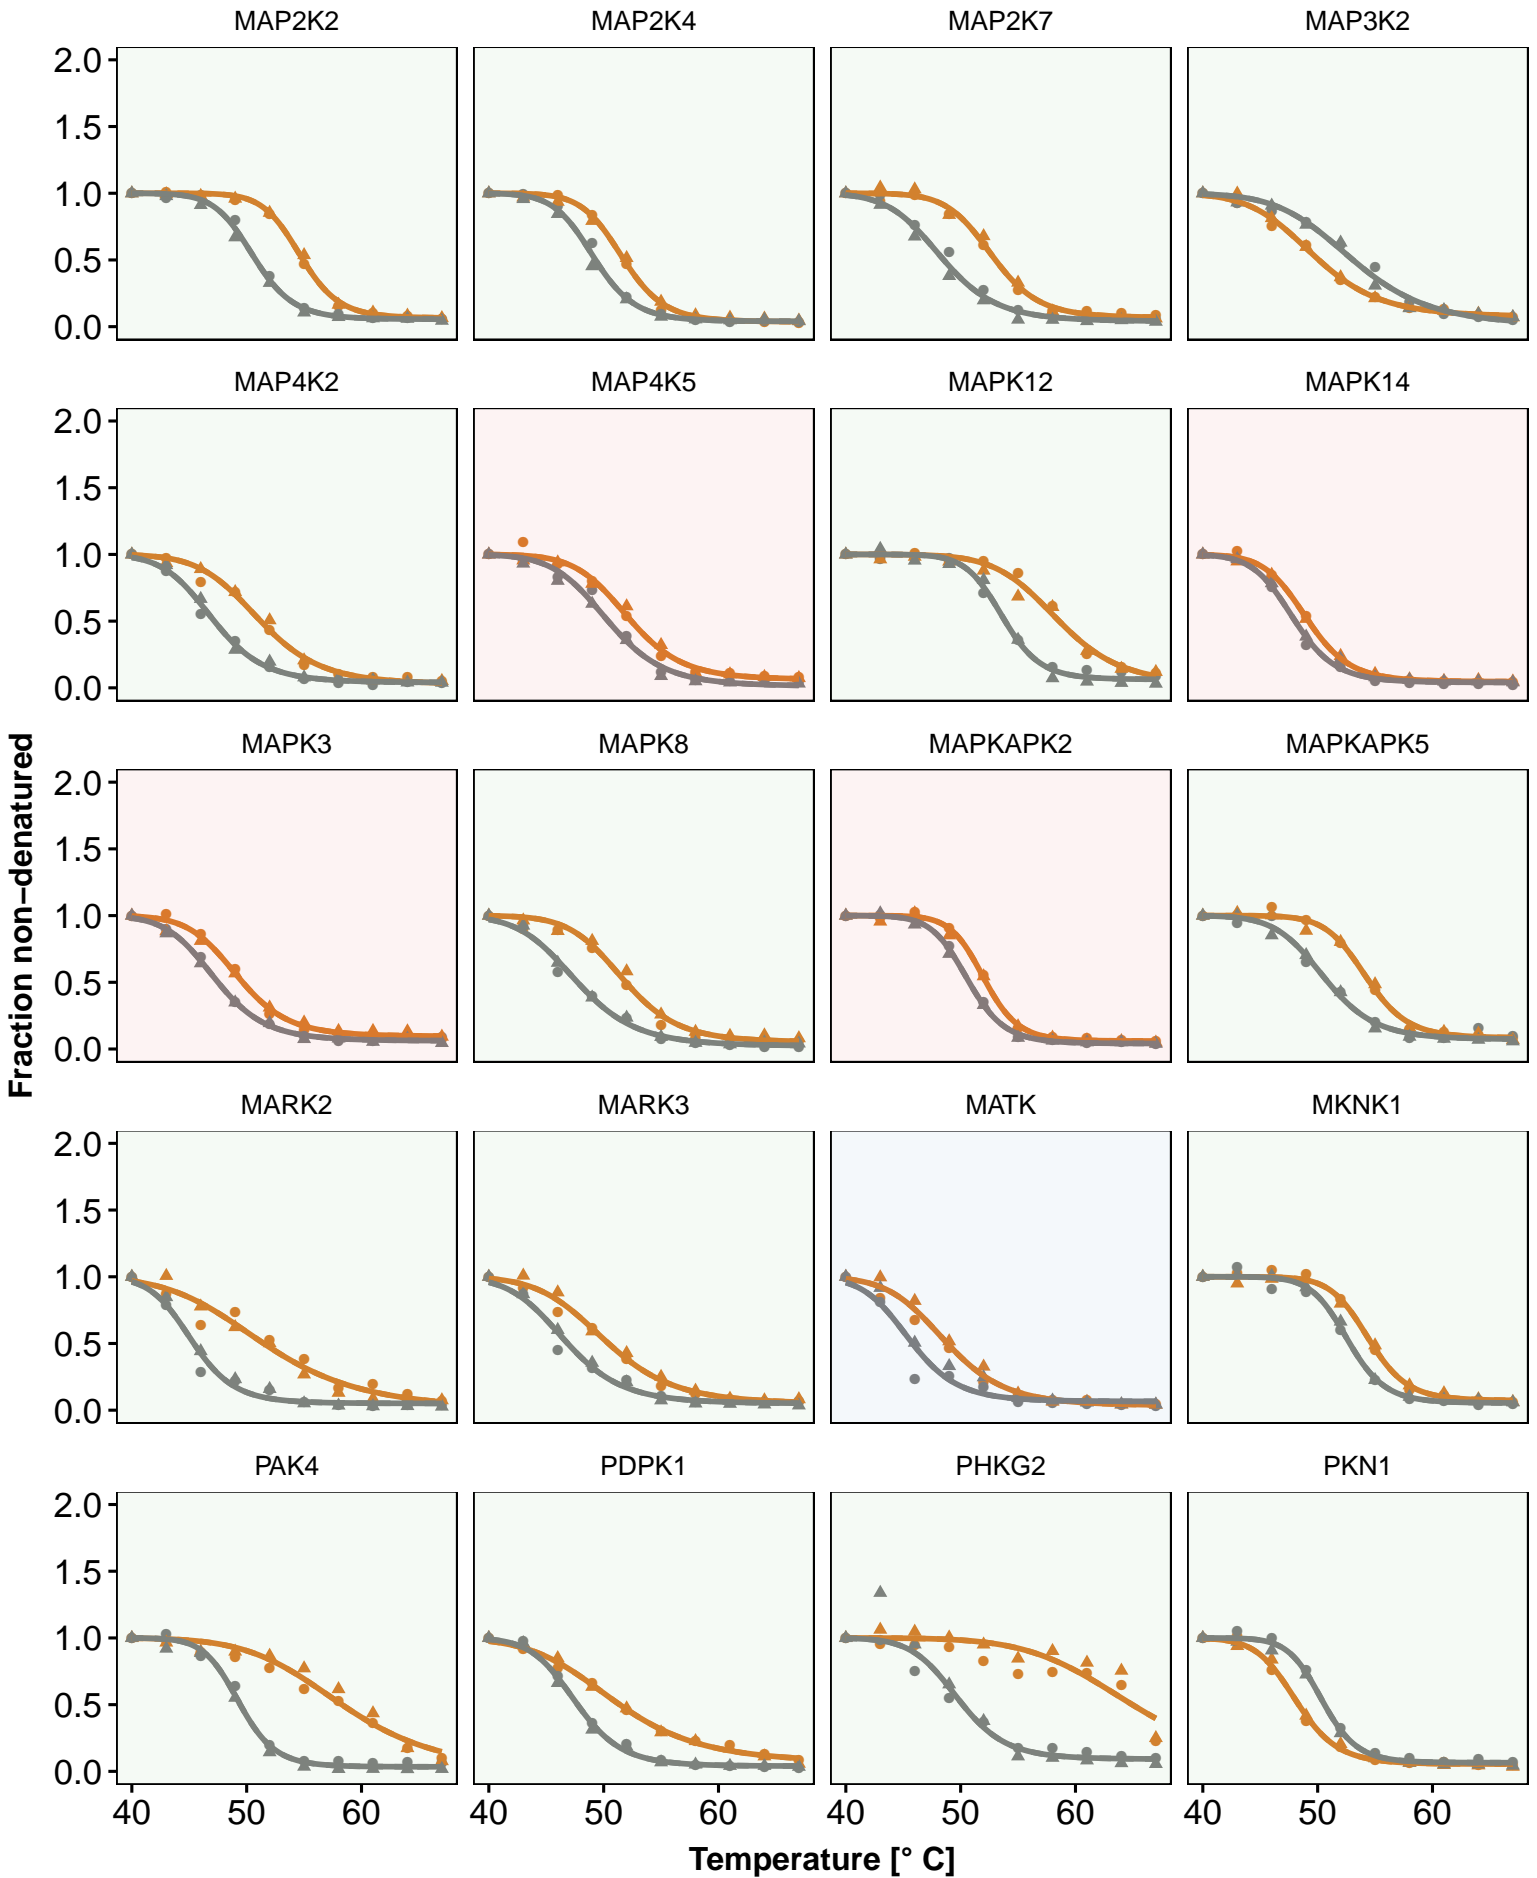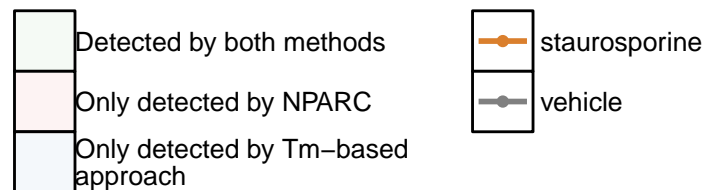

# Annotated by GO term 'protein kinase'

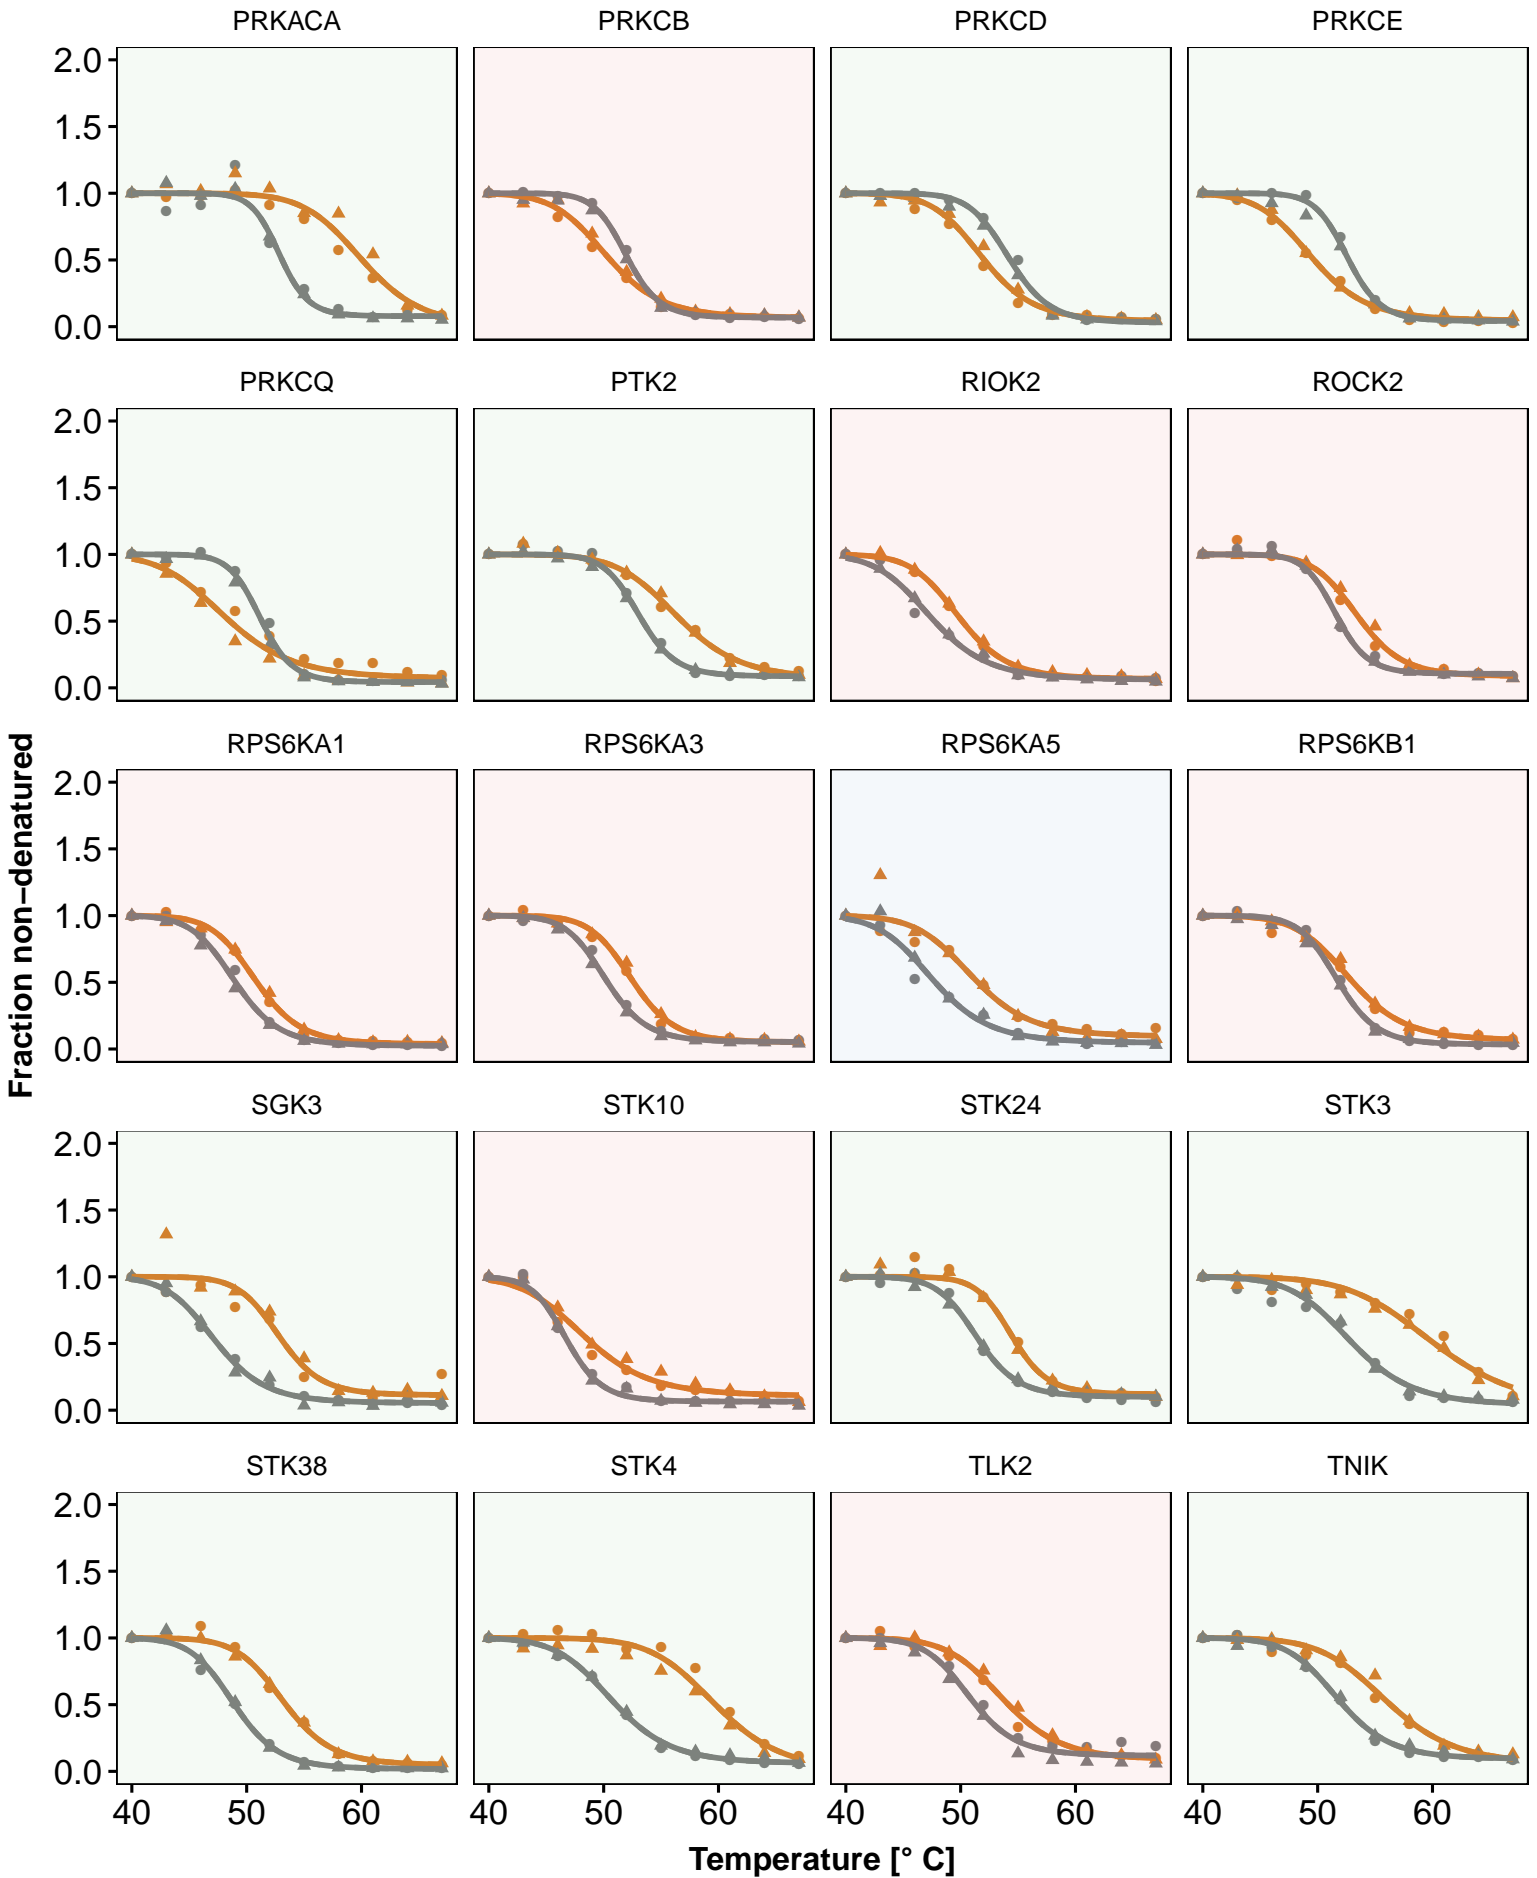

# Annotated by GO term 'protein kinase'

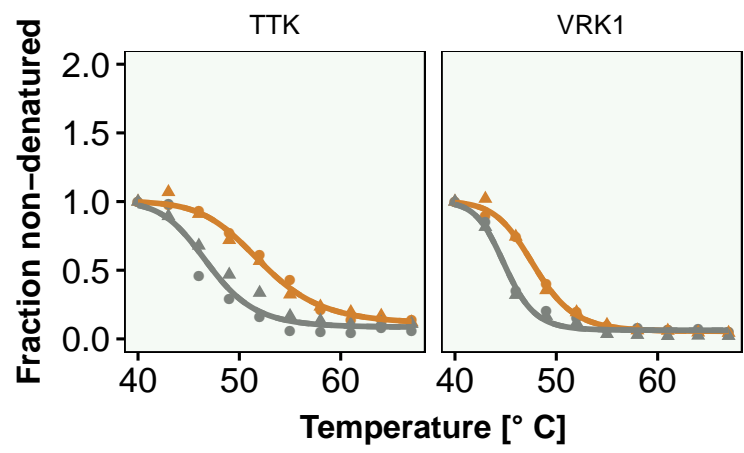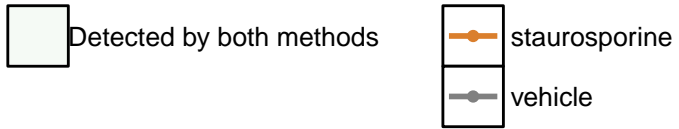

# Not annotated by GO term 'protein kinase'

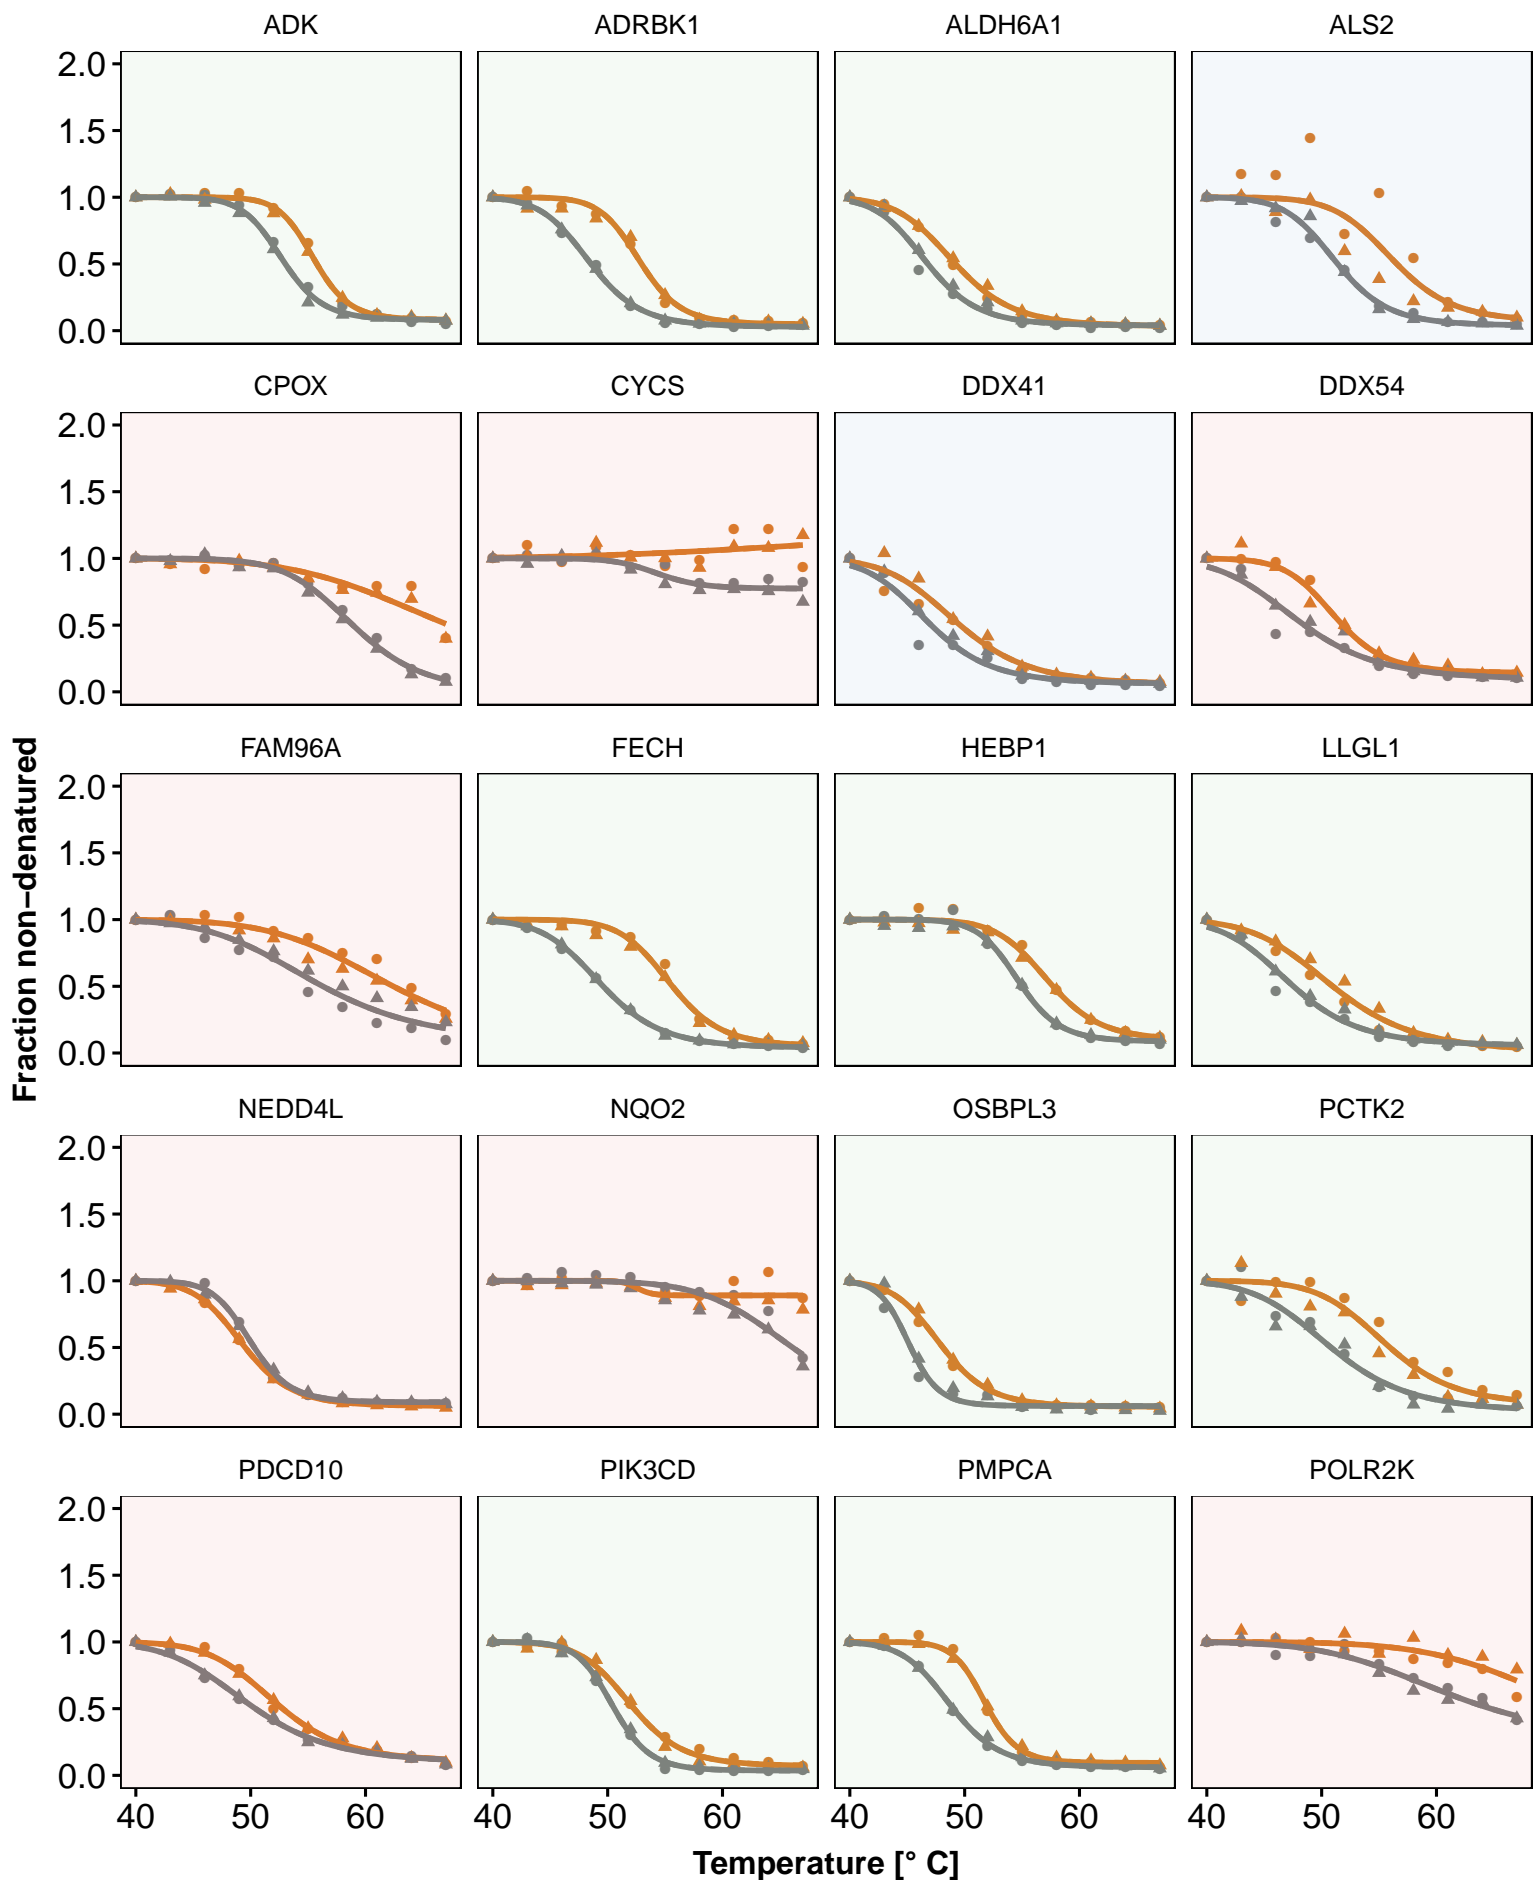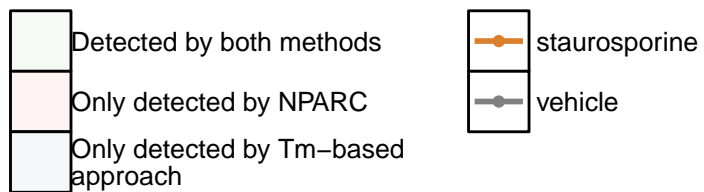

# Not annotated by GO term 'protein kinase'

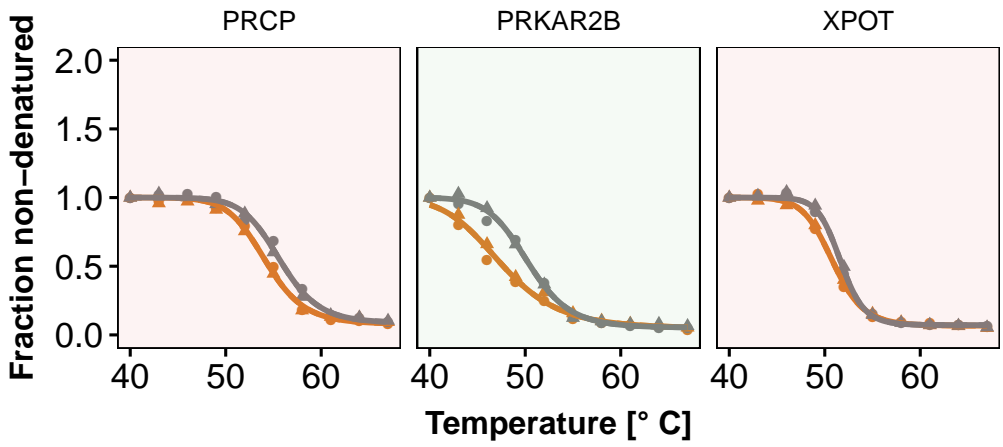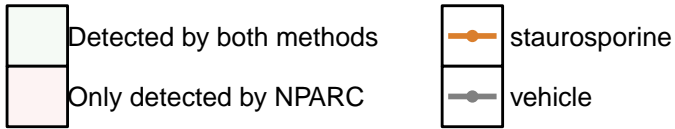

Supplement: 144658_1_supp_388214_px6cr4.pdf [file 144658_1_supp_388214_px6cr4.pdf]
