# Supplementary material for: Nonparametric Analysis of Thermal Proteome Profiles Reveals Novel Drug-binding Proteins
Source: PubMed Central journal article supplement (PMC6885700; doi:10.1074/mcp.tir119.001481), 2019-10-03

# Annotated by GO term 'ATP binding'

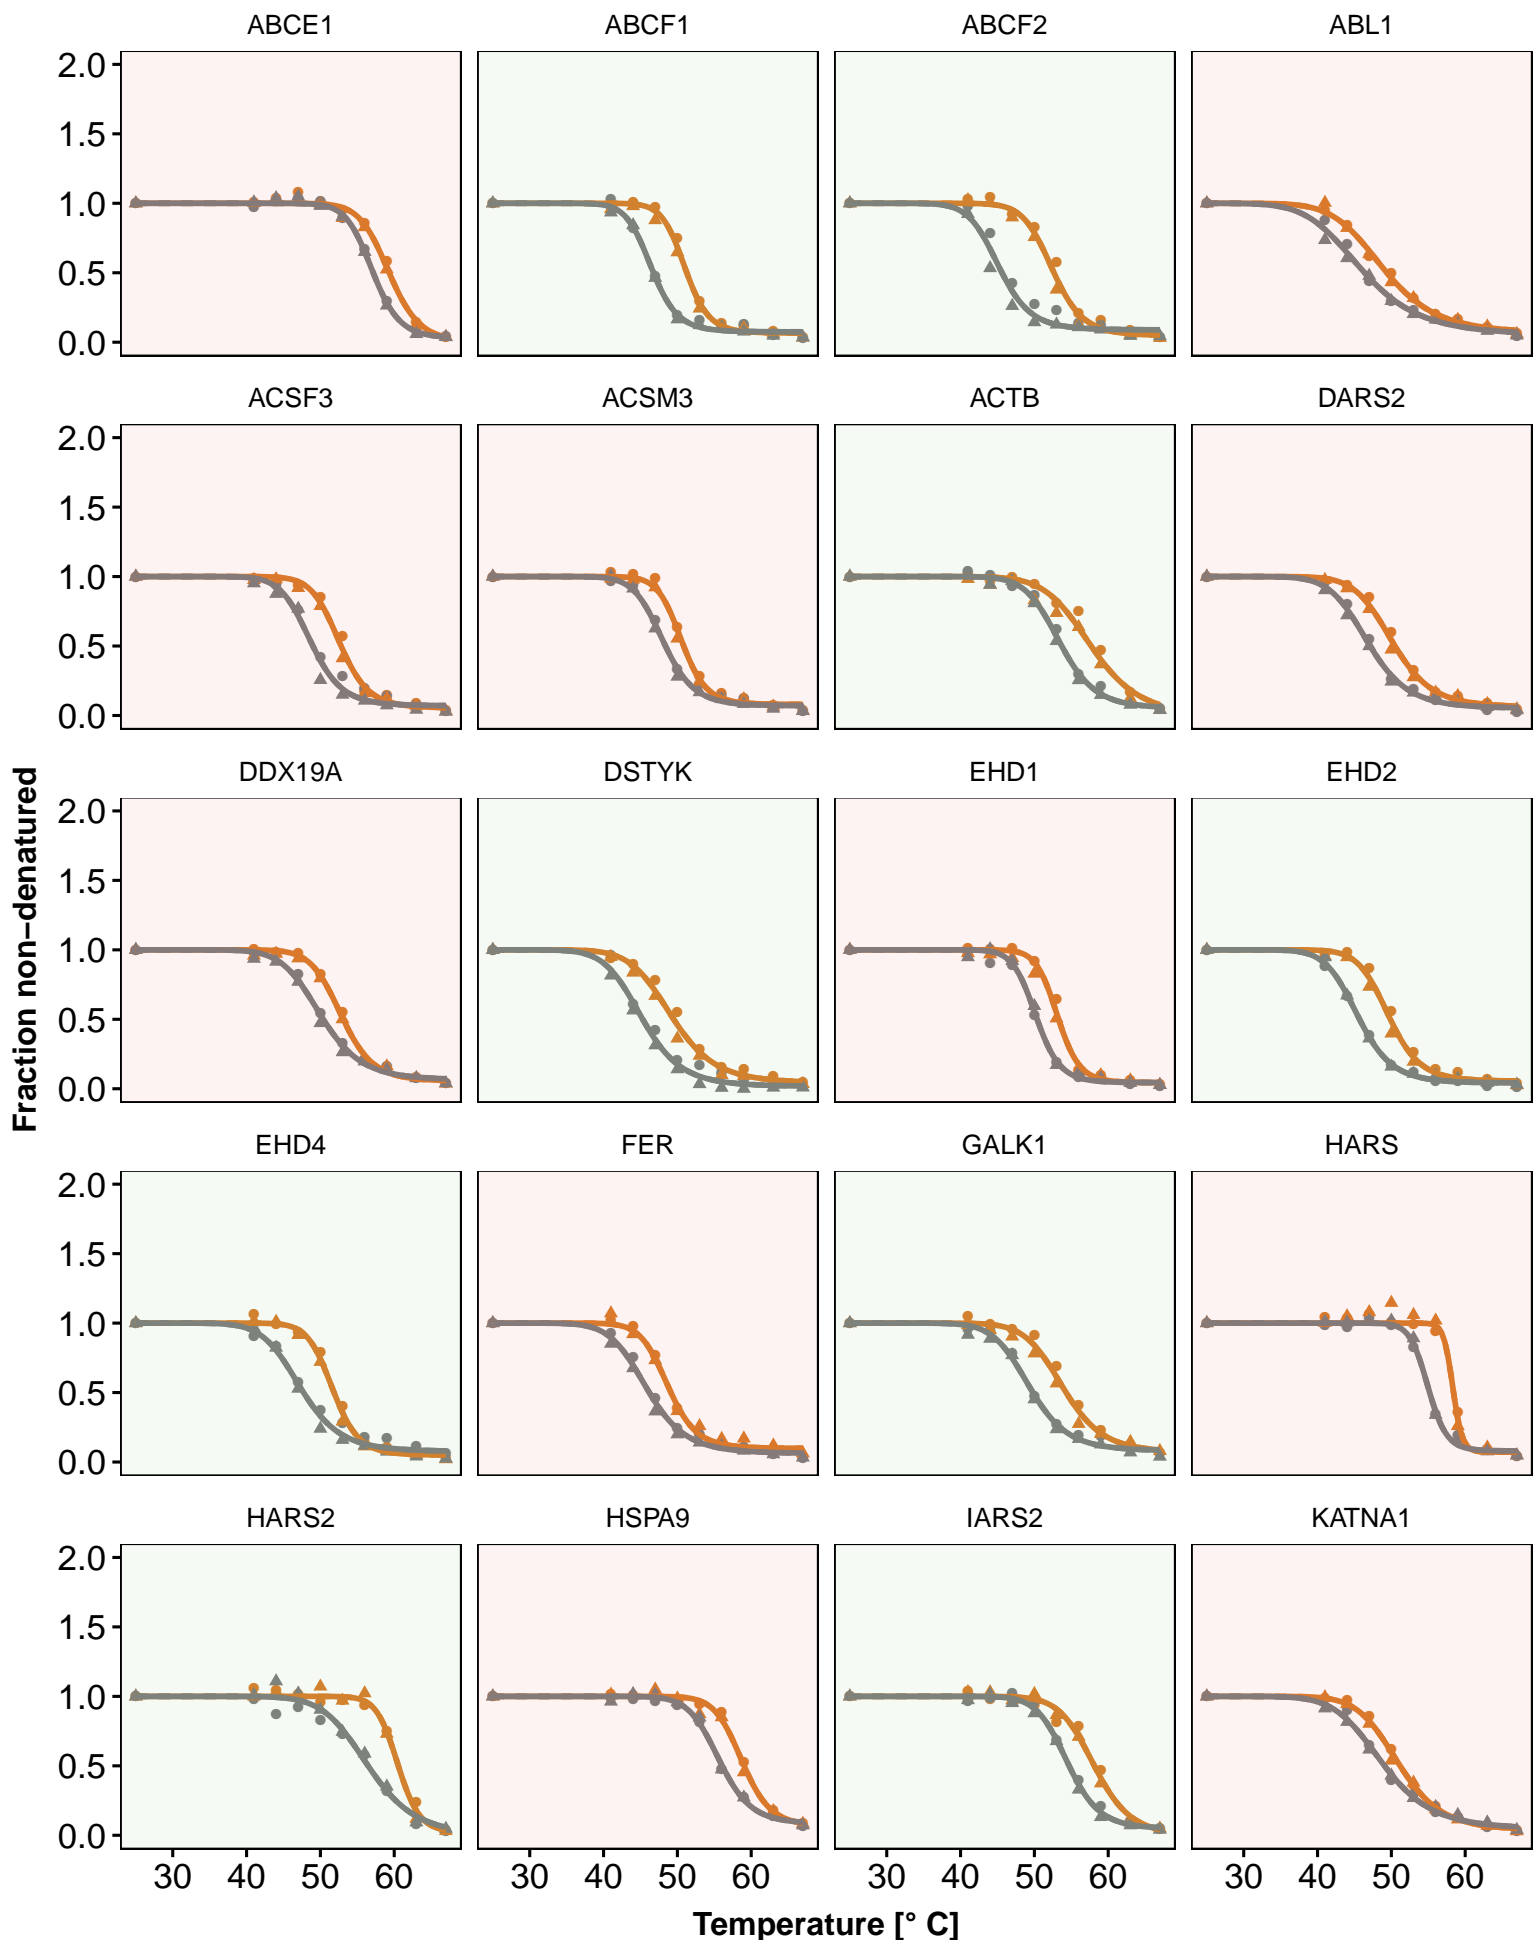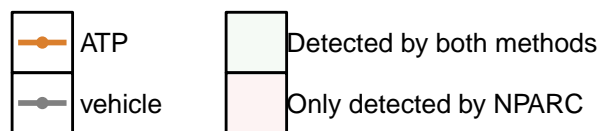

# Annotated by GO term 'ATP binding'

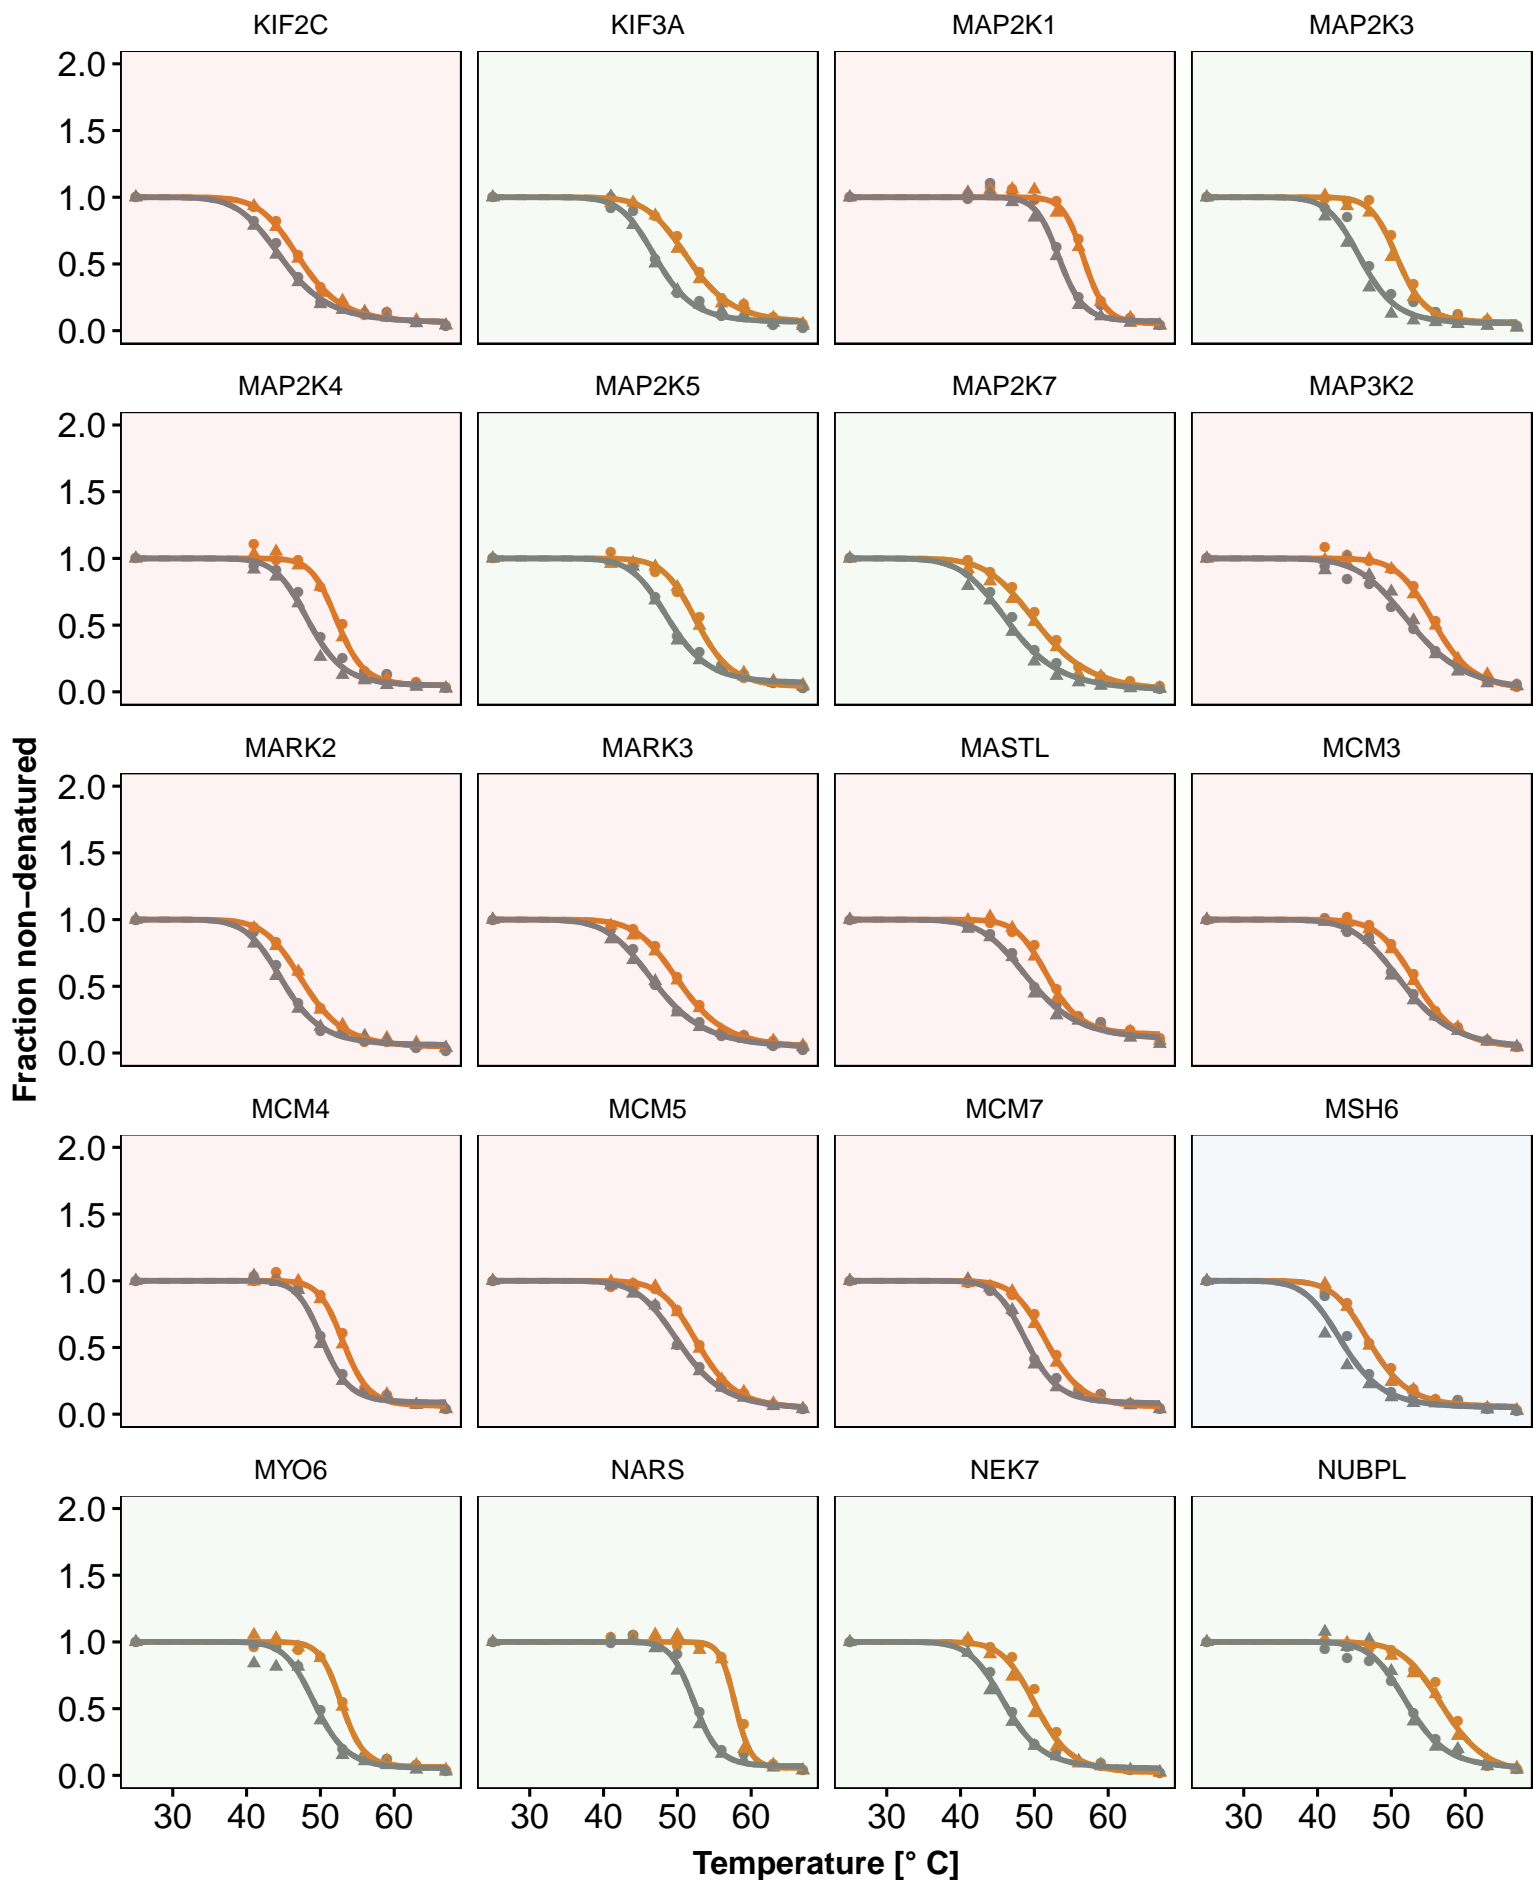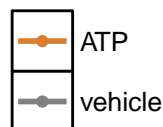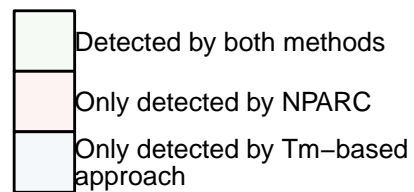

# Annotated by GO term 'ATP binding'

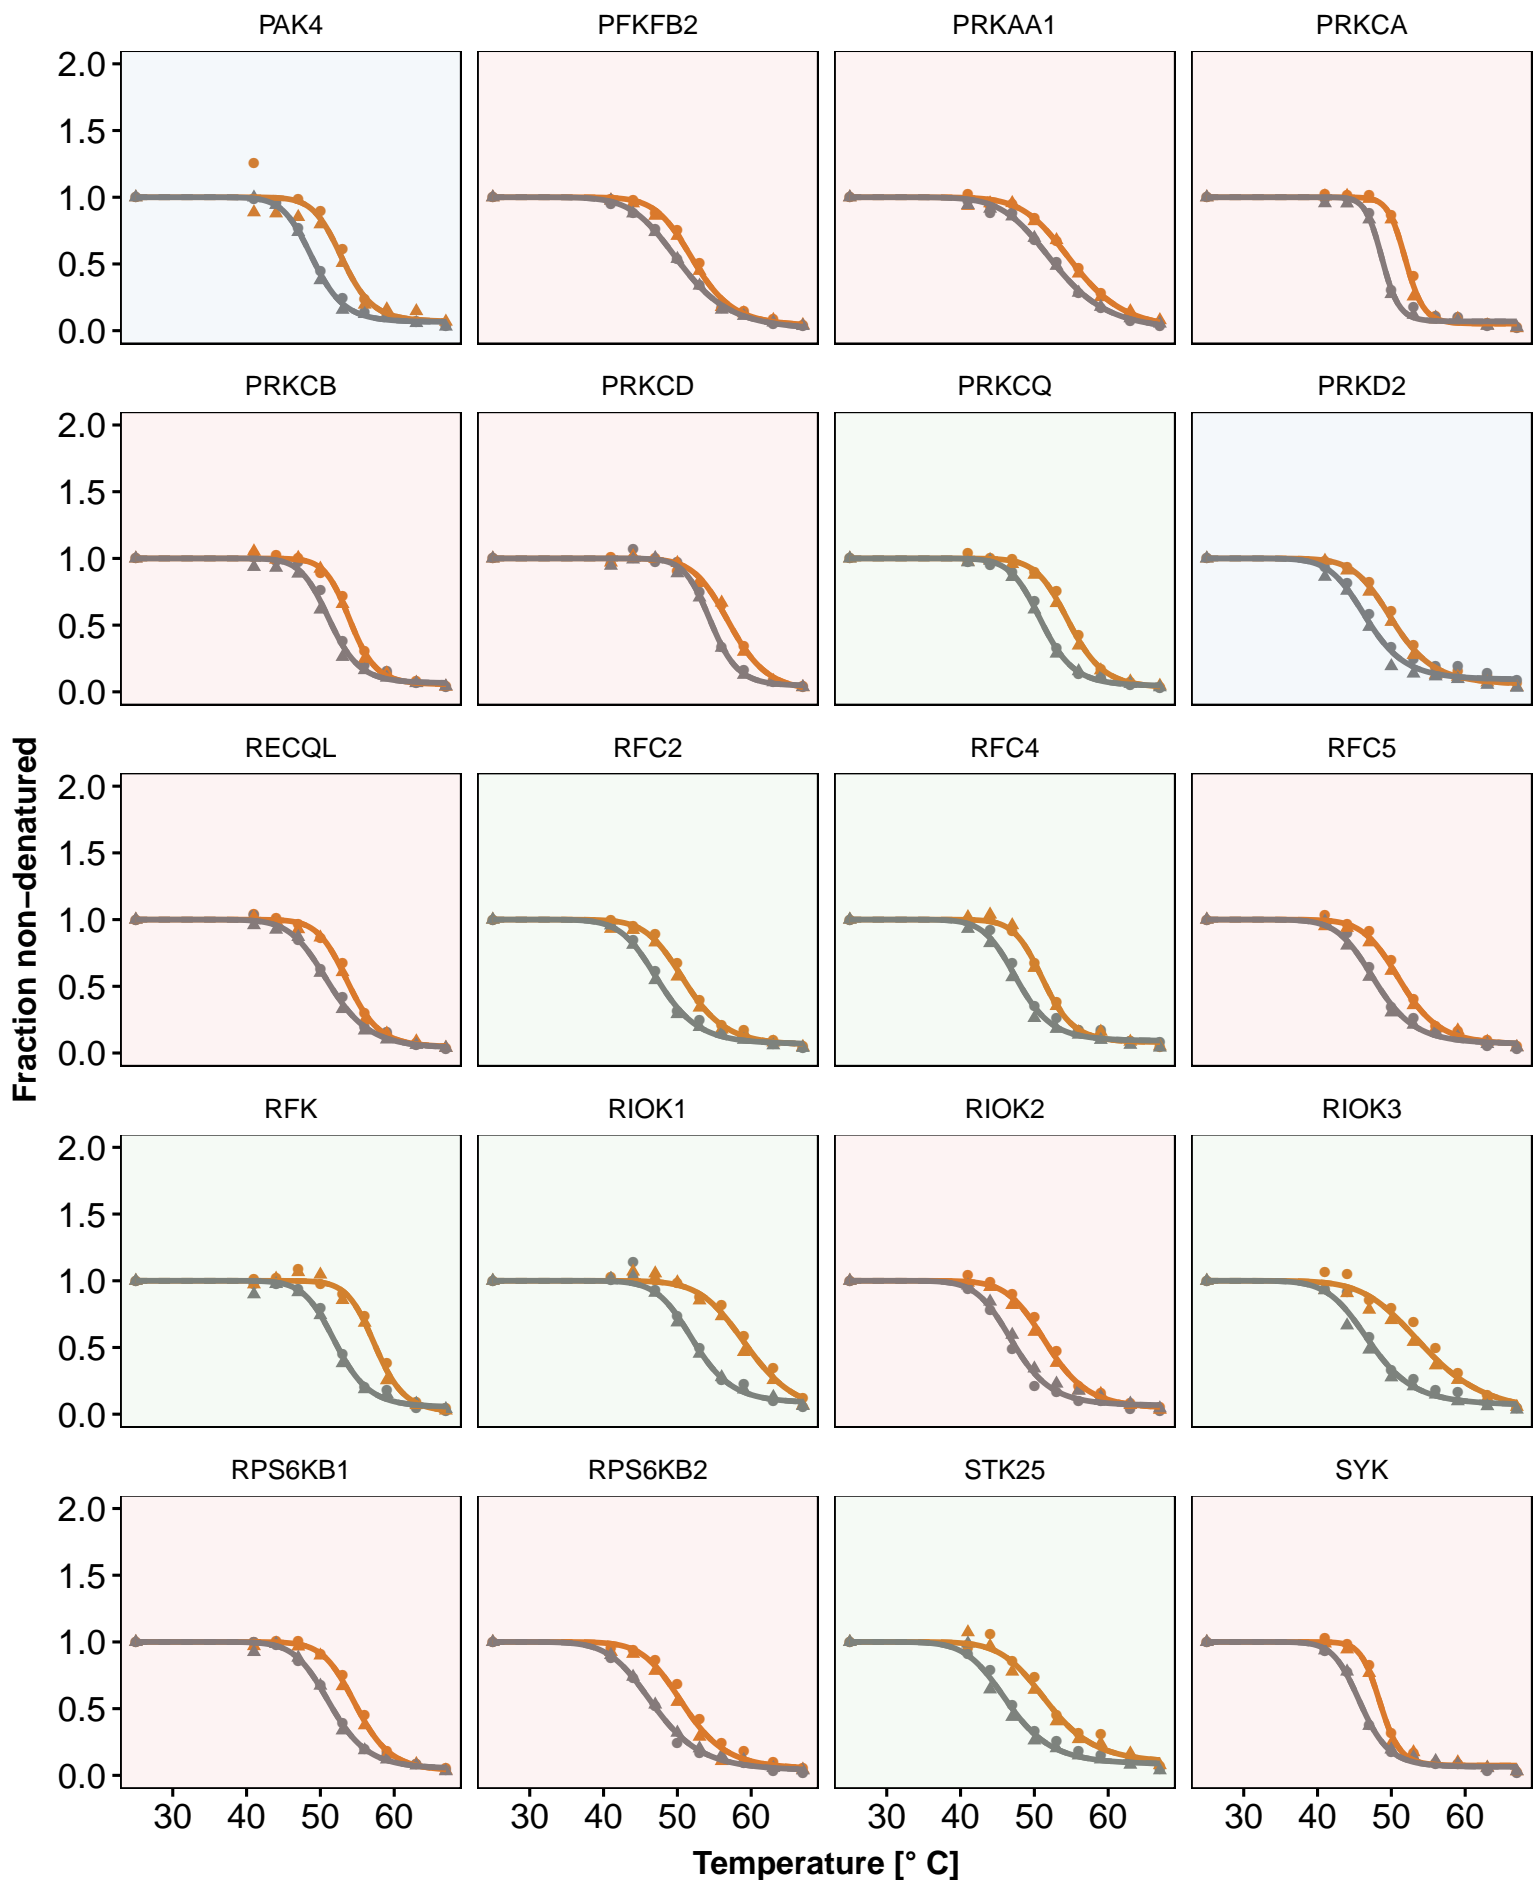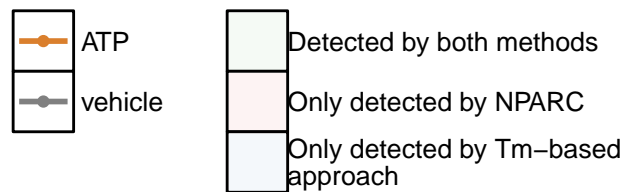

# Annotated by GO term 'ATP binding'

THG1L

TP53RK

TRIP13

VPS4A

VPS4B

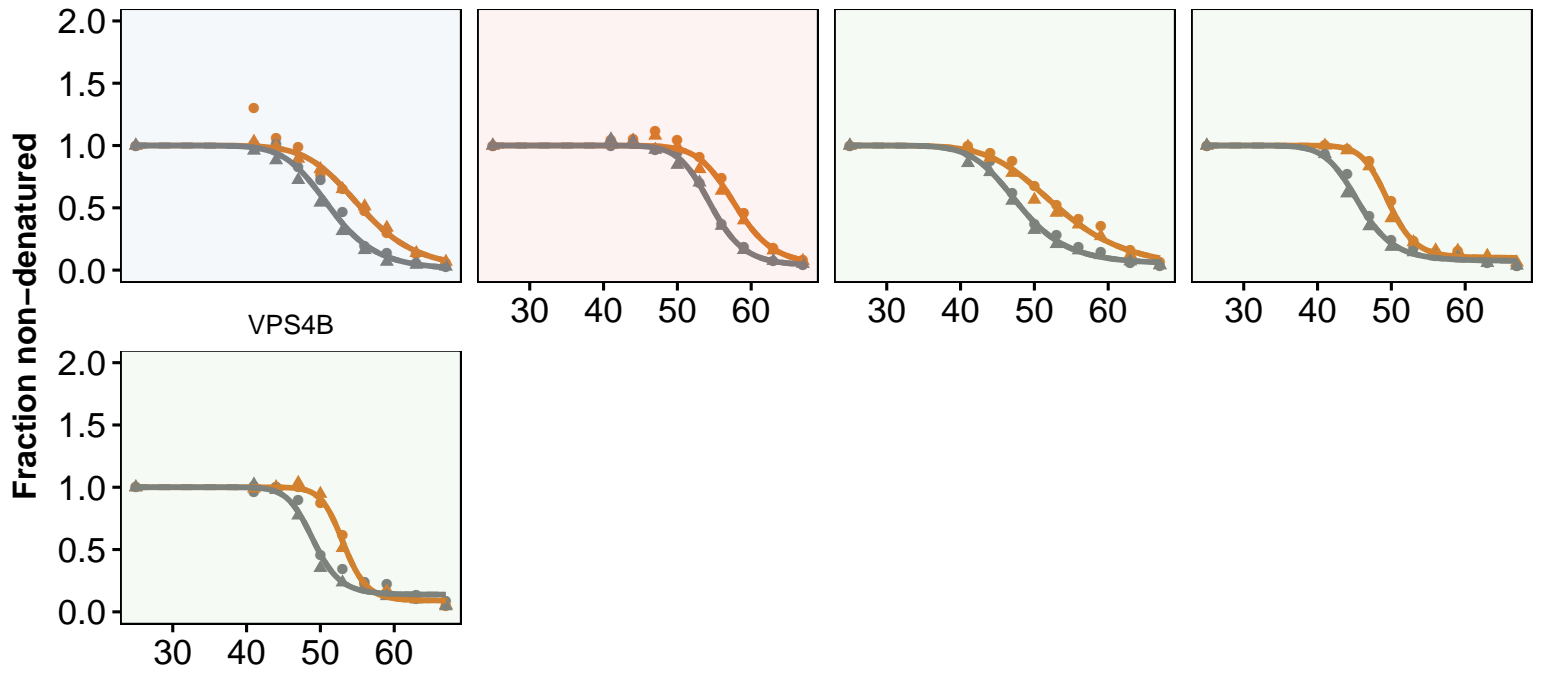

Temperature [° C]

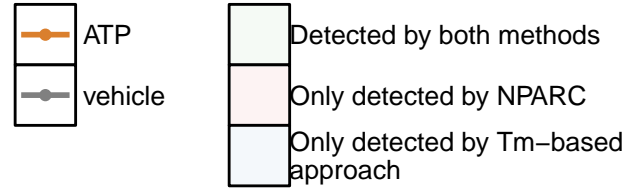

# Not annotated by GO term 'ATP binding'

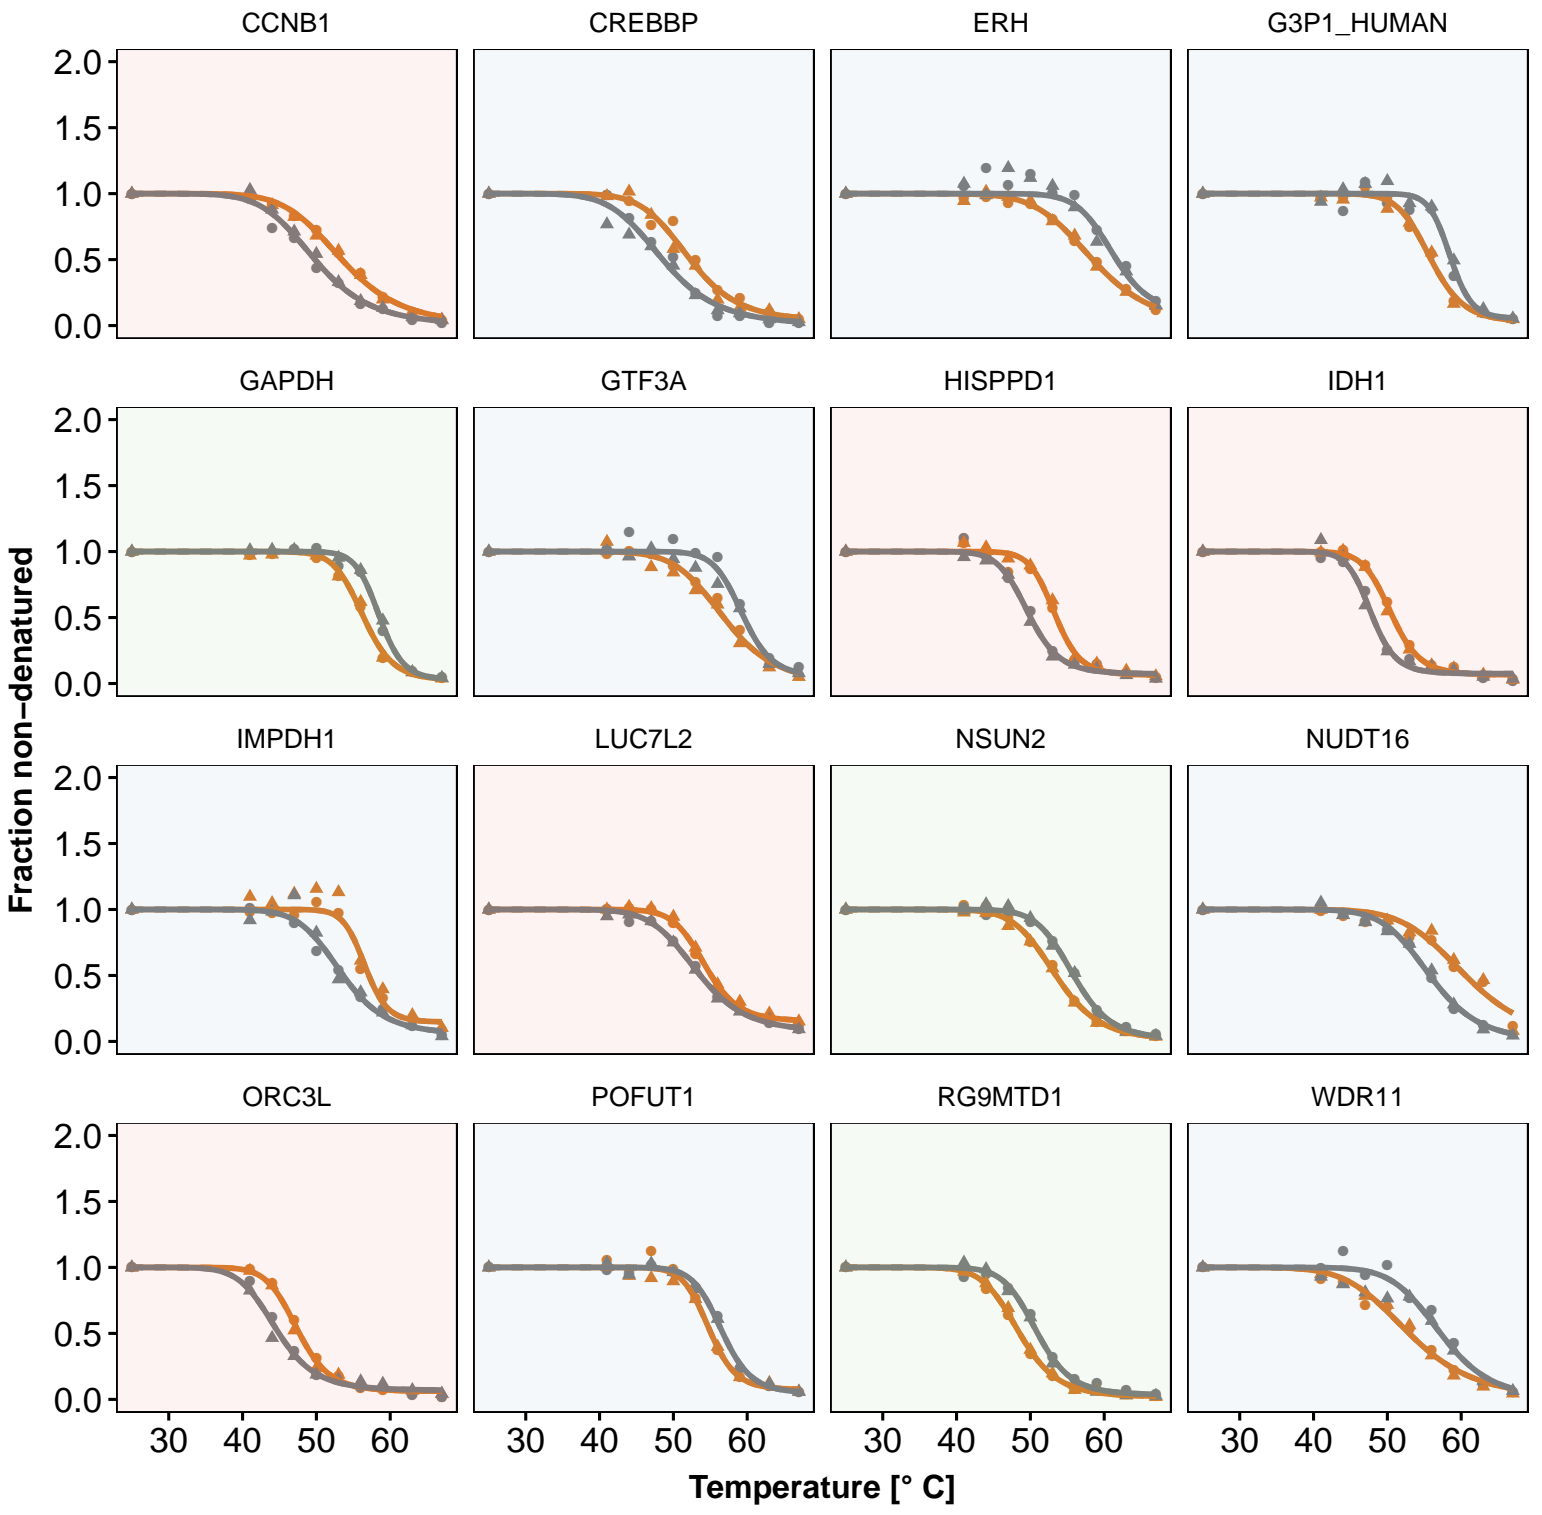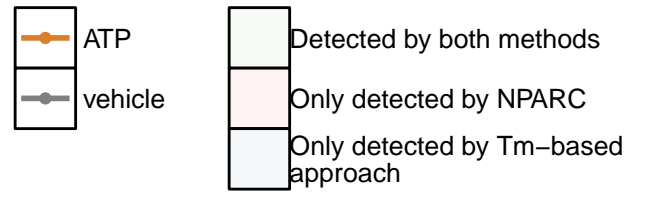

Supplement: 144658_1_supp_388215_px6cr4.pdf [file 144658_1_supp_388215_px6cr4.pdf]
